# Supplementary material for: Novel Insights into the Diversity of Catabolic Metabolism from Ten Haloarchaeal Genomes
Source: PubMed Central journal article supplement (PMC3102087; doi:10.1371/journal.pone.0020237), 2011-05-25

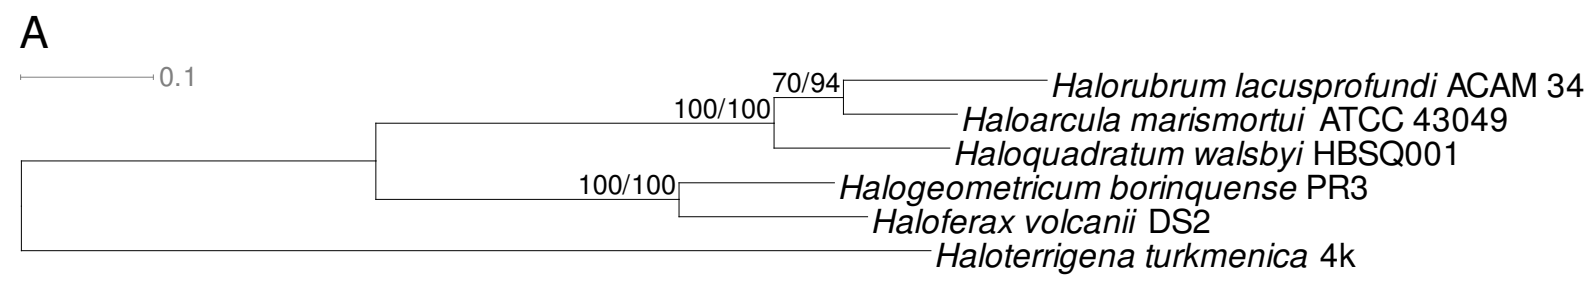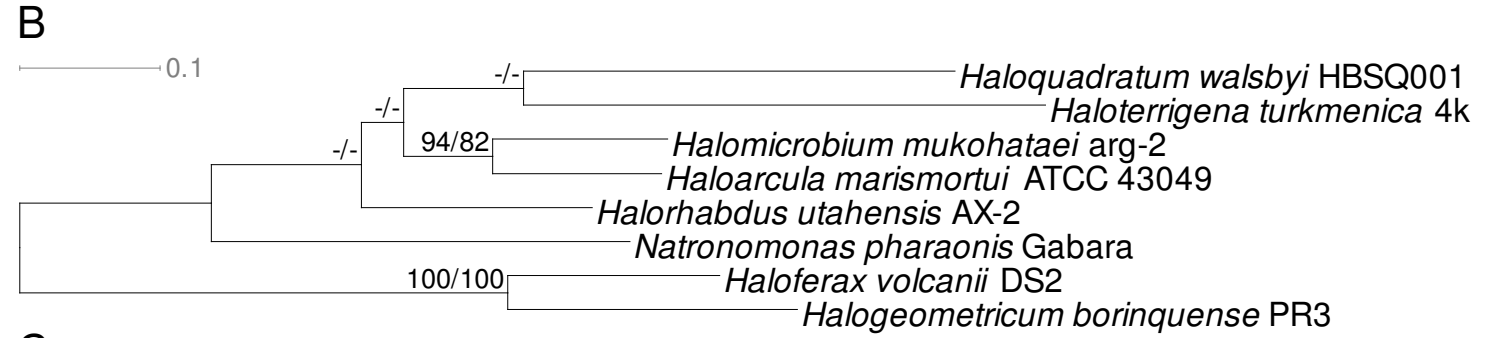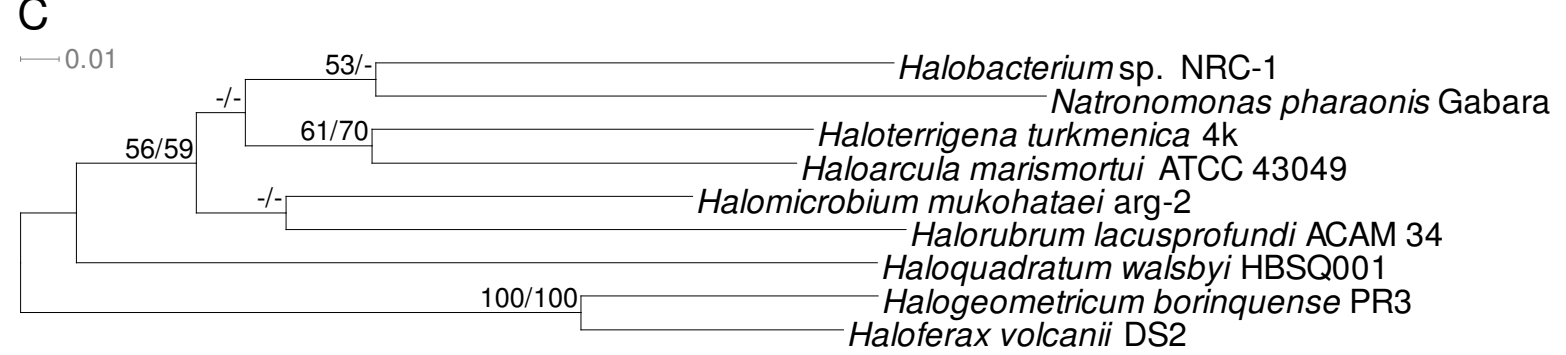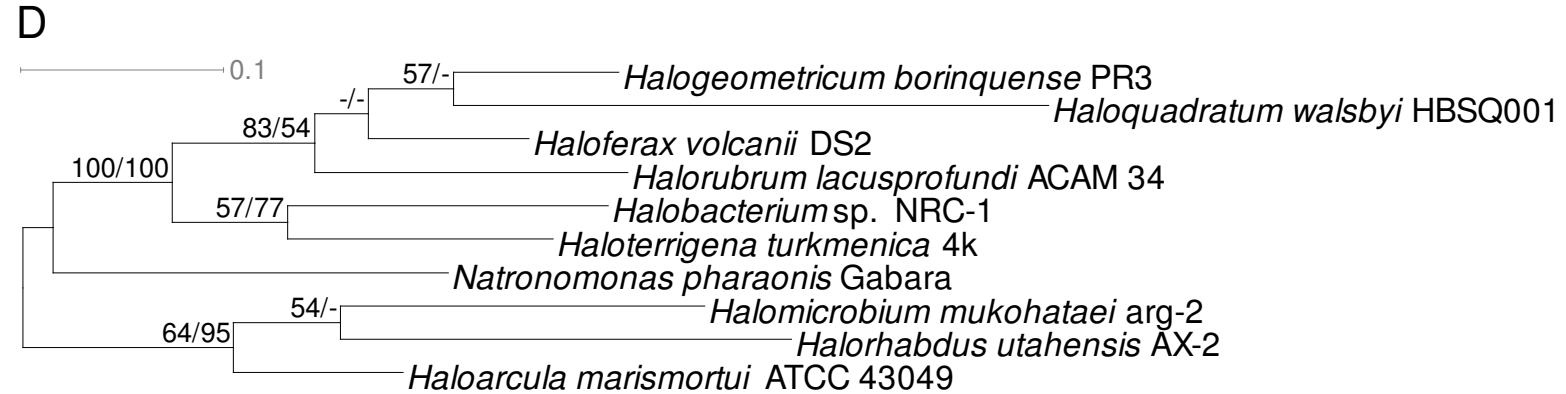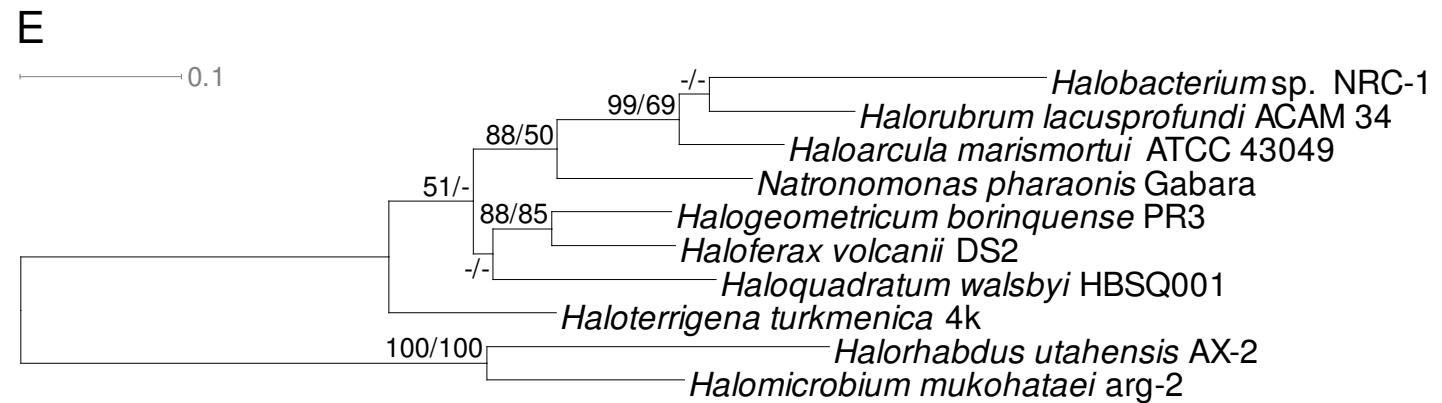

Supplement: pone.0020237.s002.pdf [file pone.0020237.s002.pdf]
