# Supplementary material for: Novel Insights into the Diversity of Catabolic Metabolism from Ten Haloarchaeal Genomes
Source: PLoS One. 2011 May 25;6(5):e20237. doi: 10.1371/journal.pone.0020237 (PMC3102087; doi:10.1371/journal.pone.0020237)
Supplement: Table S1 — Sum of partitioned Bremer support (PBS) values for all OrthoMCL clusters in which at least four ingroup genomes were present, aggregated according to the corresponding COG categories and classes, after correcting for the effect of the number of genomes represented in each cluster and the number of parsimony-informative characters. Median support is positive for most categories; the fact that most mean support values are negative is most likely due to the presence of few outliers (see Figure S2). (XLS) [file pone.0020237.s003.xls]

## Sheet: Sheet1
COG Class	COG Category	Name Of Category	Number Of OrthoMCL Clusters	Median Number Of Genomes Represented	Median Number Of Parsimony-Informative Characters	Median Sum Of PBS	MAD Sum Of PBS	Mean Sum Of PBS	Standard Deviation Of Sum PBS
Cellular processes and signaling	D	Cell cycle control, cell division, chromosome partitioning	27	9	77	-2.39275	11.1513	-1.7453	21.4193
Cellular processes and signaling	M	Cell wall/membrane/envelope biogenesis	64	6	67.5	-0.835337	7.83136	-8.42959	29.8625
Cellular processes and signaling	N	Cell motility	22	8	85.5	-1.74246	13.8668	-1.76135	12.3247
Cellular processes and signaling	O	Posttranslational modification, protein turnover, chaperones	102	9	59.5	1.98537	14.8129	0.376982	16.9373
Cellular processes and signaling	T	Signal transduction mechanisms	69	6	54	-0.104558	6.29808	-0.765536	13.3854
Cellular processes and signaling	U	Intracellular trafficking, secretion, and vesicular transport	24	10	111	5.38071	12.5408	8.82373	17.6601
Cellular processes and signaling	V	Defense mechanisms	23	5	57	1.88283	9.74017	-0.50646	15.0225
Cellular processes and signaling	[all categories]	[none]	331	8	65	0.65228	11.372	-1.32814	19.8966
Information storage and processing	A	RNA processing and modification	1	6	66	-0.254129	0	-0.254129	NA
Information storage and processing	B	Chromatin structure and dynamics	3	10	113	5.65817	6.84048	5.887	4.96105
Information storage and processing	J	Translation, ribosomal structure and biogenesis	157	10	58	0.672441	12.4639	-0.287523	21.9417
Information storage and processing	K	Transcription	117	9	45	1.04962	5.91572	0.292194	11.9339
Information storage and processing	L	Replication, recombination and repair	130	9	74.5	0.991681	9.03214	2.71895	17.8721
Information storage and processing	[all categories]	[none]	408	8	57.5	0.994099	9.33133	0.882147	18.1211
Metabolism	C	Energy production and conversion	160	8	86	0.99946	10.4426	-0.831801	32.4606
Metabolism	E	Amino acid transport and metabolism	217	8	90	1.19919	13.9253	0.968735	20.9094
Metabolism	F	Nucleotide transport and metabolism	64	10	68	-0.371296	11.5379	-1.08513	15.154
Metabolism	G	Carbohydrate transport and metabolism	104	6	72	0.173733	6.60283	0.560774	14.5928
Metabolism	H	Coenzyme transport and metabolism	115	9	75	-2.25919	16.6202	-6.91949	26.515
Metabolism	I	Lipid transport and metabolism	67	8	82	1.27994	14.6448	-1.64017	26.6321
Metabolism	P	Inorganic ion transport and metabolism	136	7	70.5	1.19436	7.70666	3.01916	24.796
Metabolism	Q	Secondary metabolites biosynthesis, transport and catabolism	27	7	81	-1.0059	9.42859	2.31537	15.8402
Metabolism	[all categories]	[none]	890	10	80	0.551206	11.3498	-0.411812	24.2364
Poorly characterized	R	General function prediction only	355	7	69	0.17161	7.93602	-0.422906	17.4689
Poorly characterized	S	Function unknown	229	8	55	0.715808	9.40955	0.106412	17.3315
Poorly characterized	[all categories]	[none]	584	8	65	0.362617	8.67855	-0.215348	17.4022
